# Supplementary material
Source: publisher site journal article supplement (https://www.dovepress.com/article/supplementary_file/575111/575111_Supplementary.docx)
Supplement: Supplementary file 1 [file 575111_Supplementary.docx]

[Supplementary](C:/Users/LX/Desktop/降重6-21 Anonymized Main Document.docx" \l "SM1) Table 1. The GWAS information of circulating cytokines

| id | trait | group_name | year | consortium | sex | pmid | population | unit | sample_size |
| --- | --- | --- | --- | --- | --- | --- | --- | --- | --- |
| ebi-a-GCST004455 | Interleukin-2 levels | public | 2016 | NA | NA | 27989323 | European | NA | 3475 |
| ebi-a-GCST004436 | Macrophage colony stimulating factor levels | public | 2016 | NA | NA | 27989323 | European | NA | 840 |
| ebi-a-GCST004432 | Platelet-derived growth factor BB levels | public | 2016 | NA | NA | 27989323 | European | NA | 8293 |
| ebi-a-GCST004420 | CTACK levels | public | 2016 | NA | NA | 27989323 | European | NA | 3631 |
| ebi-a-GCST004460 | Eotaxin levels | public | 2016 | NA | NA | 27989323 | European | NA | 8153 |
| ebi-a-GCST004422 | Vascular endothelial growth factor levels | public | 2016 | NA | NA | 27989323 | European | NA | 7118 |
| ebi-a-GCST004437 | Monocyte chemoattractant protein-3 levels | public | 2016 | NA | NA | 27989323 | European | NA | 843 |
| ebi-a-GCST004438 | Monocyte chemoattractant protein-1 levels | public | 2016 | NA | NA | 27989323 | European | NA | 8293 |
| ebi-a-GCST004441 | Interleukin-18 levels | public | 2016 | NA | NA | 27989323 | European | NA | 3636 |
| ebi-a-GCST004421 | beta-nerve growth factor levels | public | 2016 | NA | NA | 27989323 | European | NA | 3531 |
| ebi-a-GCST004452 | Interleukin-5 levels | public | 2016 | NA | NA | 27989323 | European | NA | 3364 |
| ebi-a-GCST004428 | Stem cell growth factor beta levels | public | 2016 | NA | NA | 27989323 | European | NA | 3682 |
| ebi-a-GCST004433 | Macrophage inflammatory protein 1b levels | public | 2016 | NA | NA | 27989323 | European | NA | 8243 |
| ebi-a-GCST004442 | Interleukin-17 levels | public | 2016 | NA | NA | 27989323 | European | NA | 7760 |
| ebi-a-GCST004457 | Growth-regulated protein alpha levels | public | 2016 | NA | NA | 27989323 | European | NA | 3505 |
| ebi-a-GCST004449 | Hepatocyte growth factor levels | public | 2016 | NA | NA | 27989323 | European | NA | 8292 |
| ebi-a-GCST004424 | TRAIL levels | public | 2016 | NA | NA | 27989323 | European | NA | 8186 |
| ebi-a-GCST004446 | Interleukin-6 levels | public | 2016 | NA | NA | 27989323 | European | NA | 8189 |
| ebi-a-GCST004426 | Tumor necrosis factor alpha levels | public | 2016 | NA | NA | 27989323 | European | NA | 3454 |
| ebi-a-GCST004429 | Stem cell factor levels | public | 2016 | NA | NA | 27989323 | European | NA | 8290 |
| ebi-a-GCST004451 | Interleukin-7 levels | public | 2016 | NA | NA | 27989323 | European | NA | 3409 |
| ebi-a-GCST004459 | Fibroblast growth factor basic levels | public | 2016 | NA | NA | 27989323 | European | NA | 7565 |
| ebi-a-GCST004435 | Monokine induced by gamma interferon levels | public | 2016 | NA | NA | 27989323 | European | NA | 3685 |
| ebi-a-GCST004454 | Interleukin-2 receptor antagonist levels | public | 2016 | NA | NA | 27989323 | European | NA | 3677 |
| ebi-a-GCST004434 | Macrophage inflammatory protein 1a levels | public | 2016 | NA | NA | 27989323 | European | NA | 3522 |
| ebi-a-GCST004448 | Interleukin-1-beta levels | public | 2016 | NA | NA | 27989323 | European | NA | 3309 |
| ebi-a-GCST004430 | Interleukin-16 levels | public | 2016 | NA | NA | 27989323 | European | NA | 3483 |
| ebi-a-GCST004447 | Interleukin-1-receptor antagonist levels | public | 2016 | NA | NA | 27989323 | European | NA | 3638 |
| ebi-a-GCST004445 | Interleukin-8 levels | public | 2016 | NA | NA | 27989323 | European | NA | 3526 |
| ebi-a-GCST004453 | Interleukin-4 levels | public | 2016 | NA | NA | 27989323 | European | NA | 8124 |
| ebi-a-GCST004427 | Stromal-cell-derived factor 1 alpha levels | public | 2016 | NA | NA | 27989323 | European | NA | 5998 |
| ebi-a-GCST004443 | Interleukin-13 levels | public | 2016 | NA | NA | 27989323 | European | NA | 3557 |
| ebi-a-GCST004440 | Interferon gamma-induced protein 10 levels | public | 2016 | NA | NA | 27989323 | European | NA | 3685 |
| ebi-a-GCST004439 | Interleukin-12p70 levels | public | 2016 | NA | NA | 27989323 | European | NA | 8270 |
| ebi-a-GCST004423 | Macrophage Migration Inhibitory Factor levels | public | 2016 | NA | NA | 27989323 | European | NA | 3494 |
| ebi-a-GCST004431 | RANTES levels | public | 2016 | NA | NA | 27989323 | European | NA | 3421 |
| ebi-a-GCST004458 | Granulocyte-colony stimulating factor levels | public | 2016 | NA | NA | 27989323 | European | NA | 7904 |
| ebi-a-GCST004450 | Interleukin-9 levels | public | 2016 | NA | NA | 27989323 | European | NA | 3634 |
| ebi-a-GCST004456 | Interferon gamma levels | public | 2016 | NA | NA | 27989323 | European | NA | 7701 |
| ebi-a-GCST004425 | Tumor necrosis factor beta levels | public | 2016 | NA | NA | 27989323 | European | NA | 1559 |
| ebi-a-GCST004444 | Interleukin-10 levels | public | 2016 | NA | NA | 27989323 | European | NA | 7681 |

[Supplementary](C:/Users/LX/Desktop/降重6-21 Anonymized Main Document.docx" \l "SM1) Table 2.The GWAS summary information of blood lipids

| Trait | Build | PMID | nsnp | Population |
| --- | --- | --- | --- | --- |
| HDL-C | GLGC | 29083407 | 242276 | European |
| LDL-C | GLGC | 29083407 | 242276 | European |
| TC | GLGC | 29083407 | 242279 | European |
| TG | GLGC | 29083407 | 242267 | European |

HDL–C, high–density lipoprotein cholesterol; LDL–C, low–density lipoprotein cholesterol;TG, triglyceride; SNP, single–nucleotide polymorphism

[Supplementary](C:/Users/LX/Desktop/降重6-21 Anonymized Main Document.docx" \l "SM1) Table 3. Summary results of the MR Steiger

| Exposure | Outcome | Steiger test *P* | Steiger test direction |
| --- | --- | --- | --- |
| cngb-met112-53 | finngen_R10_N14_FEMALEINFERT | 5.59731438396742e-08 | TRUE |
| ebi-NMRmet325-GCST90445849 | finngen_R10_N14_FEMALEINFERT | 1.45581182873483e-156 | TRUE |
| ebi-cfb233-GCST90301973 | finngen_R10_N14_FEMALEINFERT | 0 | TRUE |
| ieu-a-780 | finngen_R10_N14_FEMALEINFERT | 0 | TRUE |
| ieu-b-4816 | finngen_R10_N14_FEMALEINFERT | 5.82043908539915e-185 | TRUE |
| GLGC_HDL | finngen_R10_N14_FEMALEINFERT | 0 | TRUE |
| GLGC_LDL | finngen_R10_N14_FEMALEINFERT | 0 | TRUE |
| GLGC_TC | finngen_R10_N14_FEMALEINFERT | 0 | TRUE |
| GLGC_TG | finngen_R10_N14_FEMALEINFERT | 0 | TRUE |
| GCST90274759 | finngen_R10_N14_FEMALEINFERT | 0 | TRUE |
| GCST90274764 | finngen_R10_N14_FEMALEINFERT | 1.73075527243026e-91 | TRUE |
| GCST90274765 | finngen_R10_N14_FEMALEINFERT | 3.93939212058107e-101 | TRUE |
| GCST90274767 | finngen_R10_N14_FEMALEINFERT | 6.3584984554155e-212 | TRUE |
| GCST90274768 | finngen_R10_N14_FEMALEINFERT | 0 | TRUE |
| GCST90274769 | finngen_R10_N14_FEMALEINFERT | 2.89193573757751e-25 | TRUE |
| GCST90274770 | finngen_R10_N14_FEMALEINFERT | 0 | TRUE |
| GCST90274771 | finngen_R10_N14_FEMALEINFERT | 7.95159628569072e-101 | TRUE |
| GCST90274772 | finngen_R10_N14_FEMALEINFERT | 1.46999591373629e-266 | TRUE |
| GCST90274773 | finngen_R10_N14_FEMALEINFERT | 1.47047727536453e-82 | TRUE |
| GCST90274774 | finngen_R10_N14_FEMALEINFERT | 6.55702260491024e-279 | TRUE |
| GCST90274775 | finngen_R10_N14_FEMALEINFERT | 2.29711249948075e-148 | TRUE |
| GCST90274777 | finngen_R10_N14_FEMALEINFERT | 4.99954931805723e-280 | TRUE |
| GCST90274778 | finngen_R10_N14_FEMALEINFERT | 1.11424019495038e-28 | TRUE |
| GCST90274780 | finngen_R10_N14_FEMALEINFERT | 9.35605357099134e-75 | TRUE |
| GCST90274781 | finngen_R10_N14_FEMALEINFERT | 2.96645447659291e-74 | TRUE |
| GCST90274782 | finngen_R10_N14_FEMALEINFERT | 5.14205603746872e-217 | TRUE |
| GCST90274783 | finngen_R10_N14_FEMALEINFERT | 1.20936300003158e-271 | TRUE |
| GCST90274784 | finngen_R10_N14_FEMALEINFERT | 9.57810247523257e-51 | TRUE |
| GCST90274785 | finngen_R10_N14_FEMALEINFERT | 2.68604039309774e-99 | TRUE |
| GCST90274787 | finngen_R10_N14_FEMALEINFERT | 7.48095748381217e-59 | TRUE |
| GCST90274788 | finngen_R10_N14_FEMALEINFERT | 1.13748423183263e-71 | TRUE |
| GCST90274791 | finngen_R10_N14_FEMALEINFERT | 8.29061804842172e-161 | TRUE |
| GCST90274792 | finngen_R10_N14_FEMALEINFERT | 7.16361917781766e-96 | TRUE |
| GCST90274795 | finngen_R10_N14_FEMALEINFERT | 6.50827209311879e-43 | TRUE |
| GCST90274797 | finngen_R10_N14_FEMALEINFERT | 2.48642574062085e-275 | TRUE |
| GCST90274798 | finngen_R10_N14_FEMALEINFERT | 0 | TRUE |
| GCST90274800 | finngen_R10_N14_FEMALEINFERT | 3.20301667068807e-212 | TRUE |
| GCST90274803 | finngen_R10_N14_FEMALEINFERT | 2.34750792788773e-96 | TRUE |
| GCST90274804 | finngen_R10_N14_FEMALEINFERT | 3.64936320598575e-175 | TRUE |
| GCST90274820 | finngen_R10_N14_FEMALEINFERT | 2.94311385618027e-79 | TRUE |
| GCST90274821 | finngen_R10_N14_FEMALEINFERT | 3.57841102804465e-101 | TRUE |
| GCST90274822 | finngen_R10_N14_FEMALEINFERT | 0 | TRUE |
| GCST90274823 | finngen_R10_N14_FEMALEINFERT | 3.27848342373919e-62 | TRUE |
| GCST90274824 | finngen_R10_N14_FEMALEINFERT | 2.44414595914505e-184 | TRUE |
| GCST90274825 | finngen_R10_N14_FEMALEINFERT | 8.71029618326427e-213 | TRUE |
| GCST90274826 | finngen_R10_N14_FEMALEINFERT | 3.67704646309622e-76 | TRUE |
| GCST90274827 | finngen_R10_N14_FEMALEINFERT | 2.03973475269235e-190 | TRUE |
| GCST90274830 | finngen_R10_N14_FEMALEINFERT | 5.72329698649755e-83 | TRUE |
| GCST90274831 | finngen_R10_N14_FEMALEINFERT | 4.26849571080134e-38 | TRUE |
| GCST90274833 | finngen_R10_N14_FEMALEINFERT | 2.0741046147801e-168 | TRUE |
| GCST90274835 | finngen_R10_N14_FEMALEINFERT | 2.78579439913576e-78 | TRUE |
| GCST90274836 | finngen_R10_N14_FEMALEINFERT | 3.1942042875877e-77 | TRUE |
| GCST90274840 | finngen_R10_N14_FEMALEINFERT | 7.59863670307535e-285 | TRUE |
| GCST90274842 | finngen_R10_N14_FEMALEINFERT | 6.96235581569542e-84 | TRUE |
| GCST90274843 | finngen_R10_N14_FEMALEINFERT | 8.1441948012177e-270 | TRUE |
| GCST90274844 | finngen_R10_N14_FEMALEINFERT | 4.11261261160958e-146 | TRUE |
| GCST90274846 | finngen_R10_N14_FEMALEINFERT | 4.50193289751736e-92 | TRUE |
| GCST90274847 | finngen_R10_N14_FEMALEINFERT | 6.15847421178923e-96 | TRUE |
| GCST90274848 | finngen_R10_N14_FEMALEINFERT | 0 | TRUE |

Supplementary Fig.1.


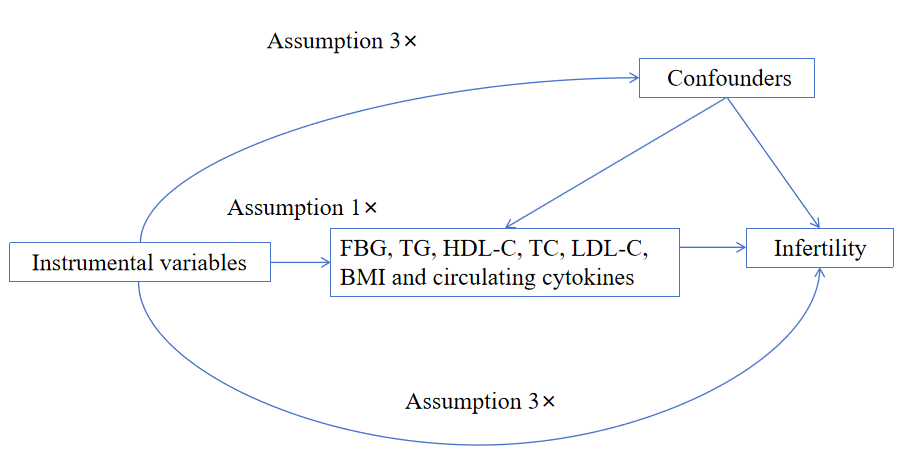


Supplementary Fig.1. The research is based on three hypotheses: (1) The instrumental variable is strongly correlated with diet-derived antioxidants; (2) The instrumental variable is not correlated with the confounding factors; (3) The instrumental variable is not directly related to infertility, and its effect on infertility can only be through FBG(fasting blood glucose), TG(triglycerides ), HDL-C(high-density lipoprotein cholesterol ), total cholesterol (TC), low-density lipoprotein cholesterol (LDL-C), body mass index(BMI) and circulating cytokines.
